# Supplementary material for: Expression of neutrophil extracellular trap-related proteins and its correlation with IL-17 and TNF-α in patients with oral lichen planus
Source: PeerJ. 2024 Oct 15;12:e18260. doi: 10.7717/peerj.18260 (PMC11488494; doi:10.7717/peerj.18260)
Supplement: Supplemental Information 1 [file peerj-12-18260-s001.xlsx]

## Sheet: IF(tissue)
group	HC	NEOLP	EOLP
1	4.926	6.715	11.19
2	4.35	8.3	11.055
3	5.013	6.055	13.157
4	4.46	6.625	11.876
5	4.089	6.744	8.208
6	4.269	6.28	9.69
7	4.189	6.568	8.408
8	4.129	7.972	11.692
9	4.15	6.186	9.361
10	4.209	6.14	9.875
11	4.183	6.432	11.933
12	4.468	7.311	8.946
13	4.211	6.213	11.824
14	4.151	6.577	12.21
15	4.204	6.935	13.063
16	4.468	6.555	10.465
17	4.327	7.376	12.78
18	4.414	6.433	9.723
19	4.405	6.024	8.789
20	3.911	7.678	12.473
mean	4.3263	6.75595	10.8359
standard error	0.263367	0.649948	1.6094
	4.326±0.263	6.756±0.650	10.835±1.609

## Sheet: IF（peripheral blood）
group	HC			NEOLP			EOLP
	NETs	Total cell count	Rate of formation	NETs	Total cell count	Rate of formation	NETs	Total cell count	Rate of formation		group	HC	NEOLP	EOLP
1	1	5	0.2	5	8	0.625	4	8	0.5		1	0.2	0.625	0.5
2	1	6	0.166667	4	8	0.5	5	10	0.5		2	0.166667	0.5	0.5
3	1	4	0.25	7	9	0.777778	1	7	0.142857		3	0.25	0.777778	0.142857
4	2	8	0.25	5	7	0.714286	3	6	0.5		4	0.25	0.714286	0.5
5	0	12	0	4	5	0.8	6	6	1		5	0	0.8	1
6	0	5	0	4	10	0.4	2	7	0.285714		6	0	0.4	0.285714
7	0	6	0	10	11	0.909091	9	14	0.642857		7	0	0.909091	0.642857
8	0	9	0	7	7	1	3	3	1		8	0	1	1
9	0	7	0	4	7	0.571429	6	12	0.5		9	0	0.571429	0.5
10	2	15	0.133333	10	14	0.714286	5	10	0.5		10	0.133333	0.714286	0.5
11	1	5	0.2	7	9	0.777778	5	7	0.714286		11	0.2	0.777778	0.714286
12	0	6	0	5	7	0.714286	7	8	0.875		12	0	0.714286	0.875
13	1	6	0.166667	4	7	0.571429	2	9	0.222222		13	0.166667	0.571429	0.222222
14	0	6	0	5	8	0.625	8	9	0.888889		14	0	0.625	0.888889
15	0	7	0	7	10	0.7	6	6	1		15	0	0.7	1
16	2	8	0.25	4	6	0.666667	6	10	0.6		16	0.25	0.666667	0.6
17	1	4	0.25	7	10	0.7	4	11	0.363636		17	0.25	0.7	0.363636
18	1	7	0.142857	6	8	0.75	3	6	0.5		18	0.142857	0.75	0.5
19	0	12	0	6	7	0.857143	4	7	0.571429		19	0	0.857143	0.571429
20	0	9	0	7	12	0.583333	2	6	0.333333		20	0	0.583333	0.333333
mean			0.100476			0.697875			0.582011		mean	0.100476	0.697875	0.582011
standard error			0.108053			0.140031			0.253552		standard error	0.108053	0.140031	0.253552
Average formation rate			0.100±0.108			0.697±0.140			0.582±0.253		Average formation rate	0.100±0.108	0.697±0.140	0.582±0.253

## Sheet: Relative fluorescence intensity
group	HC	NEOLP	EOLP
1	0.219	0.312	0.245
2	0.225	0.255	0.225
3	0.22	0.229	0.225
4	0.215	0.221	0.215
5	0.225	0.249	0.266
6	0.301	0.229	0.244
7	0.179	0.198	0.233
8	0.181	0.24	0.255
9	0.175	0.192	0.255
10	0.157	0.261	0.241
11	0.172	0.225	0.463
12	0.144	0.246	0.224
13	0.166	0.284	0.241
14	0.152	0.25	0.225
15	0.201	0.339	0.259
16	0.219	0.327	0.293
17	0.194	0.367	0.253
18	0.233	0.28	0.266
19	0.175	0.217	0.276
20	0.187	0.253	0.312
mean	0.197	0.2587	0.2608
standard error	0.0364143	0.0468493	0.0534815

## Sheet: plasma-cell coculture
	A control	B HC	C NEOLP	D EOLP									A control	B HC	C NEOLP	D EOLP
1	0.273	0.786	1.128	0.85									0.273			0.85
2	0.259	0.285	0.273	0.282									0.259	0.285	0.273	0.282
3	0.261	0.288	0.262	0.432									0.261	0.288	0.262	0.432
4	0.253	0.287	0.262	0.32									0.253	0.287	0.262	0.32
5	0.706	0.75	0.338	0.25									0.263	0.256	0.338	0.25
6	0.242	1.1	0.395	0.807									0.242	0.256	0.395	0.494
7	0.334	0.889	0.71	0.806									0.251	0.251	0.228	0.259
8	0.309	1.59	0.885	0.959									0.293		0.372	0.269
9	1.128	1.033	1.107	0.353										0.575	0.265	0.535
10	0.492	0.759	0.79	0.556									0.492		0.79	0.556
11	0.716	0.3935	0.568	0.567										0.3935	0.568	0.567
12	0.2	0.217	0.215	0.231									0.2	0.217	0.215	0.231
13	0.259	0.275	0.283	0.308									0.259	0.275	0.283	0.308
14	0.235	0.26	0.281	0.293									0.235	0.26	0.281	0.293
15	0.274	0.287	0.359	0.331									0.274	0.287	0.359	0.331
16	0.305	0.309	0.504	0.477									0.305	0.309	0.504	0.477
17	0.269	0.282	0.378	0.277									0.269	0.282	0.378	0.277
18	0.266	0.243	0.308	0.906									0.266	0.243	0.308	0.906
19	0.252	0.251	0.265										0.252	0.251	0.265
20	0.252	0.239	0.257	0.253									0.252	0.239	0.257	0.253
0.273	0.786	1.128	0.85										0.272167	0.291441	0.347526	0.415263
0.259	0.285	0.273	0.282										0.0591978	0.0825348	0.140807	0.198633
0.261	0.288	0.262	0.432
0.253	0.287	0.262	0.32
0.263	0.256	0.338	0.25
0.242	0.256	0.395	0.494
0.251	0.251	0.228	0.259
0.293	1.364	0.372	0.269
0.646	0.575	0.265	0.535
0.492	0.759	0.79	0.556
0.716	0.3935	0.568	0.567
0.2	0.217	0.215	0.231
0.259	0.275	0.283	0.308
0.235	0.26	0.281	0.293
0.274	0.287	0.359	0.331
0.305	0.309	0.504	0.477
0.269	0.282	0.378	0.277
0.266	0.243	0.308	0.906
0.252	0.251	0.265
0.252	0.239	0.257	0.253

## Sheet: Sheet3
IL-17		Temperature(¡C)	1	2	3	4	5	6	7	8	9	10	11	12
		25.5	0.286	0.2771	0.6076	0.6615	0.6437	0.4931	0.4929	0.4956	0.5222	0.5348	0.4373	0.5064
			0.0659	0.0691	0.4666	0.436	0.4978	0.4379	0.4348	0.4545	0.4723	0.5446	0.4076	0.5129
			0.1855	0.1388	0.4217	0.4196	0.4244	0.3756	0.3896	0.3942	0.4139	0.476	0.3699	0.4918
			0.3181	0.2471	0.3827	0.4323	0.3889	0.3998	0.3995	0.3816	0.4048	0.4915	0.3758	0.4876
			0.7162	0.4	0.4244	0.437	0.4522	0.4068	0.4039	0.4045	0.4887	0.5222	0.3715	0.4489
			1.2371	0.6592	0.428	0.4201	0.4037	0.4311	0.4041	0.4007	0.4573	0.5134	0.4454	0.5331
			2.1768	1.4643	0.8808	0.8059	0.881	0.8609	0.886	0.8151	0.909	1.15	0.7497	1.1011
			0.056	0.056	0.9497	0.8993	0.9146	0.9306	0.8624	0.8258	1.0702	1.139	0.8527	1.1857
TNF-a		Temperature(¡C)	1	2	3	4	5	6	7	8	9	10	11	12
		26	0.1577	0.2004	0.7668	0.5982	0.5696	0.6768	0.5723	0.535	0.5592	0.4943	0.4075	0.4345
			0.11	0.0766	0.5417	0.5198	0.5434	0.5366	0.5136	0.4616	0.5073	0.4273	0.4428	0.4303
			0.2786	0.2246	0.5417	0.5723	0.5123	0.5666	0.5611	0.4884	0.4959	0.4192	0.4238	0.4305
			0.4859	0.3285	0.5134	0.5013	0.5087	0.5411	0.4913	0.409	0.5178	0.432	0.4583	0.4085
			0.8715	0.6408	0.6341	0.6518	0.5654	0.5995	0.5193	0.4586	0.5561	0.5043	0.4085	0.4317
			1.6478	1.2327	0.5643	0.5353	0.5557	0.5419	0.5157	0.4841	0.5385	0.4794	0.4415	0.4561
			2.6633	1.8457	1.0229	0.9445	1.0127	1.1278	0.9568	0.628	1.019	0.7775	0.8105	0.8958
			0.0598	0.0592	1.279	1.0542	1.2857	1.189	1.1269	0.9513	1.1992	0.8582	0.8742	0.9873

## Sheet: IL-17
IL-17		Temperature(¡C)	1	2	3	4	5	6	7	8	9	10	11	12
		25.5	0.286	0.2771	0.6076	0.6615	0.6437	0.4931	0.4929	0.4956	0.5222	0.5348	0.4373	0.5064
			0.0659	0.0691	0.4666	0.436	0.4978	0.4379	0.4348	0.4545	0.4723	0.5446	0.4076	0.5129
			0.1855	0.1388	0.4217	0.4196	0.4244	0.3756	0.3896	0.3942	0.4139	0.476	0.3699	0.4918
			0.3181	0.2471	0.3827	0.4323	0.3889	0.3998	0.3995	0.3816	0.4048	0.4915	0.3758	0.4876
			0.7162	0.4	0.4244	0.437	0.4522	0.4068	0.4039	0.4045	0.4887	0.5222	0.3715	0.4489
			1.2371	0.6592	0.428	0.4201	0.4037	0.4311	0.4041	0.4007	0.4573	0.5134	0.4454	0.5331
			2.1768	1.4643	0.8808	0.8059	0.881	0.8609	0.886	0.8151	0.909	1.15	0.7497	1.1011
			0.056	0.056	0.9497	0.8993	0.9146	0.9306	0.8624	0.8258	1.0702	1.139	0.8527	1.1857
Standard curve			y=(-1*10^-6)x^2+0.0058x+0.0615
concentration	OD				11	12	13	14	15	16	17	18	19	20
0	0.0691			A	0.5371	0.54875	0.57075	0.4655	0.46385	0.47505	0.49725	0.5397	0.42245	0.50965
20	0.1388
40	0.2471			B	0.4022	0.42595	0.40665	0.3877	0.39455	0.3879	0.40935	0.48375	0.37285	0.4897
80	0.4
160	0.6592			C	0.4262	0.42855	0.42795	0.41895	0.404	0.4026	0.473	0.5178	0.40845	0.491
320	1.4643
				D	0.91525	0.8526	0.8978	0.89575	0.8742	0.82045	0.9896	1.1445	0.8012	1.1434
concentration	OD
0	0.0659
20	0.1855				11	12	13	14	15	16	17	18	19	20
40	0.3181			A	82.5801	84.635	88.5207	69.9931	69.7039	71.6678	75.5657	83.0386	62.4599	77.7459
80	0.7162
160	1.2371			B	58.9255	63.0714	59.7017	56.3983	57.5918	56.4331	60.1728	73.1945	53.8131	74.2393
320	2.1768
				C	63.1151	63.5258	63.4209	61.8486	59.2395	58.9953	71.3082	79.1801	60.0158	74.4676
concentration	OD			D	150.26	138.907	147.092	146.72	142.815	133.103	163.804	192.274	129.635	192.071
0	0.0675
20	0.16215				11	12	13	14	15	16	17	18	19	20
40	0.2826			A	412.901	423.175	442.604	349.965	348.519	358.339	377.828	415.193	312.3	388.73
80	0.5581
160	0.94815			B	294.628	315.357	298.509	281.991	287.959	282.166	300.864	365.972	269.066	371.196
320	1.82055
				C	315.575	317.629	317.105	309.243	296.197	294.976	356.541	395.901	300.079	372.338
				D	751.298	694.536	735.46	733.601	714.075	665.515	819.021	961.37	648.173	960.353
	11	12	13	14	15	16	17	18	19	20
A	412.901	423.175	442.604	349.965	348.519	358.339	377.828	415.193	312.3	388.73
B	294.628	315.357	298.509	281.991	287.959	282.166	300.864	365.972	269.066	371.196
C	315.575	317.629	317.105	309.243	296.197	294.976	356.541	395.901	300.079	372.338
D	751.298	694.536	735.46	733.601	714.075	665.515	819.021	961.37	648.173	960.353

## Sheet: TNF-a
TNF-a		Temperature(¡C)	1	2	3	4	5	6	7	8	9	10	11	12
		26	0.1577	0.2004	0.7668	0.5982	0.5696	0.6768	0.5723	0.535	0.5592	0.4943	0.4075	0.4345
			0.11	0.0766	0.5417	0.5198	0.5434	0.5366	0.5136	0.4616	0.5073	0.4273	0.4428	0.4303
			0.2786	0.2246	0.5417	0.5723	0.5123	0.5666	0.5611	0.4884	0.4959	0.4192	0.4238	0.4305
			0.4859	0.3285	0.5134	0.5013	0.5087	0.5411	0.4913	0.409	0.5178	0.432	0.4583	0.4085
			0.8715	0.6408	0.6341	0.6518	0.5654	0.5995	0.5193	0.4586	0.5561	0.5043	0.4085	0.4317
			1.6478	1.2327	0.5643	0.5353	0.5557	0.5419	0.5157	0.4841	0.5385	0.4794	0.4415	0.4561
			2.6633	1.8457	1.0229	0.9445	1.0127	1.1278	0.9568	0.628	1.019	0.7775	0.8105	0.8958
			0.0598	0.0592	1.279	1.0542	1.2857	1.189	1.1269	0.9513	1.1992	0.8582	0.8742	0.9873
Standard curve
concentration	OD				11	12	13	14	15	16	17	18	19	20
0	0.0933			A	0.65425	0.559	0.5565	0.6067	0.54295	0.4983	0.53325	0.4608	0.42515	0.4324
10	0.2516			B	0.52755	0.5368	0.5105	0.55385	0.5262	0.4487	0.50685	0.4256	0.44105	0.4195
20	0.4072			C	0.5992	0.59355	0.56055	0.5707	0.5175	0.47135	0.5473	0.49185	0.425	0.4439
40	0.75615			D	1.15095	0.99935	1.1492	1.1584	1.04185	0.78965	1.1091	0.81785	0.84235	0.94155
80	1.44025
160	2.2545				11	12	13	14	15	16	17	18	19	20
				A	30.6645	25.3361	25.1997	27.9723	24.4635	22.0746	23.9397	20.1119	18.2829	18.6519
				B	23.6332	24.1311	22.7217	25.0553	23.5607	19.4871	22.5277	18.3058	19.0942	17.9964
				C	27.5535	27.2391	25.4207	25.9767	23.0949	20.66	24.6993	21.7342	18.2753	19.2404
				D	62.6182	52.1239	62.4933	63.1507	55.0002	38.6816	59.6561	40.4168	41.9426	48.2943
					11	12	13	14	15	16	17	18	19	20
				A	153.322	126.68	125.998	139.862	122.318	110.373	119.699	100.559	91.4146	93.2597
				B	118.166	120.656	113.609	125.276	117.804	97.4353	112.638	91.5289	95.4709	89.9819
				C	137.768	136.196	127.104	129.884	115.475	103.3	123.496	108.671	91.3765	96.2018
				D	313.091	260.619	312.466	315.753	275.001	193.408	298.28	202.084	209.713	241.472
